# Supplementary material for: Modulation of miRNA-155 alters manganese nanoparticle-induced inflammatory response
Source: Royal Society of Chemistry journal article supplement (doi:10.1039/c6tx00208k), 2016-01-01
Supplement: c6tx00208k1.pdf [file c6tx00208k1.pdf]

## Supporting Information

### Methods

#### Optimization of miR-155 Mimic

The neuronal co-cultures were seeded in 6 well plates at a cell density of 450,000 cells/well. Following seeding and overnight incubation, a miR-155-5p mimic (Thermo Fisher Scientific) was transfected into the co-cultures using the Lipofectamine® RNAiMAX™ reagent (Thermo Fisher Scientific) per manufacturer's instructions. A mimic concentration of 5x (125 pmol) and 10x (250 pmol) was used and *Tnf- $\alpha$*  expression was chosen to validate transfection success (per manufacturer's protocol).

#### Cytotoxicity of miR-155 Mimic

The neuronal co-cultures were seeded in 96 well plates at a cell density of 50,000 cells/well. Following seeding and overnight incubation, a 5x (125 pmol) concentration of the miR-155-5p mimic (Thermo Fisher Scientific) was transfected into the co-cultures using the Lipofectamine® RNAiMAX™ reagent (Thermo Fisher Scientific) per manufacturer's instructions. Following a 72 h transfection, cell viability was evaluated using the MTS reagent (CellTiter 96®, Promega), and a weekly dose of Mn nanoparticles was used as a positive control.

#### Cytotoxicity of MnNP following miR-155 Restoration

The neuronal co-cultures were seeded in 96 well plates at a cell density of 50,000 cells/well. Following seeding and overnight incubation, a 5x (125 pmol) concentration of the miR-155-5p mimic (Thermo Fisher Scientific) was transfected into the co-cultures using the Lipofectamine® RNAiMAX™ reagent (Thermo Fisher Scientific) per manufacturer's instructions. Following a 72 h transfection, the cells were treated with the daily and weekly dose of MnNPs for 24 h. Following treatment, cell viability was evaluated using the MTS reagent (CellTiter 96®, Promega).

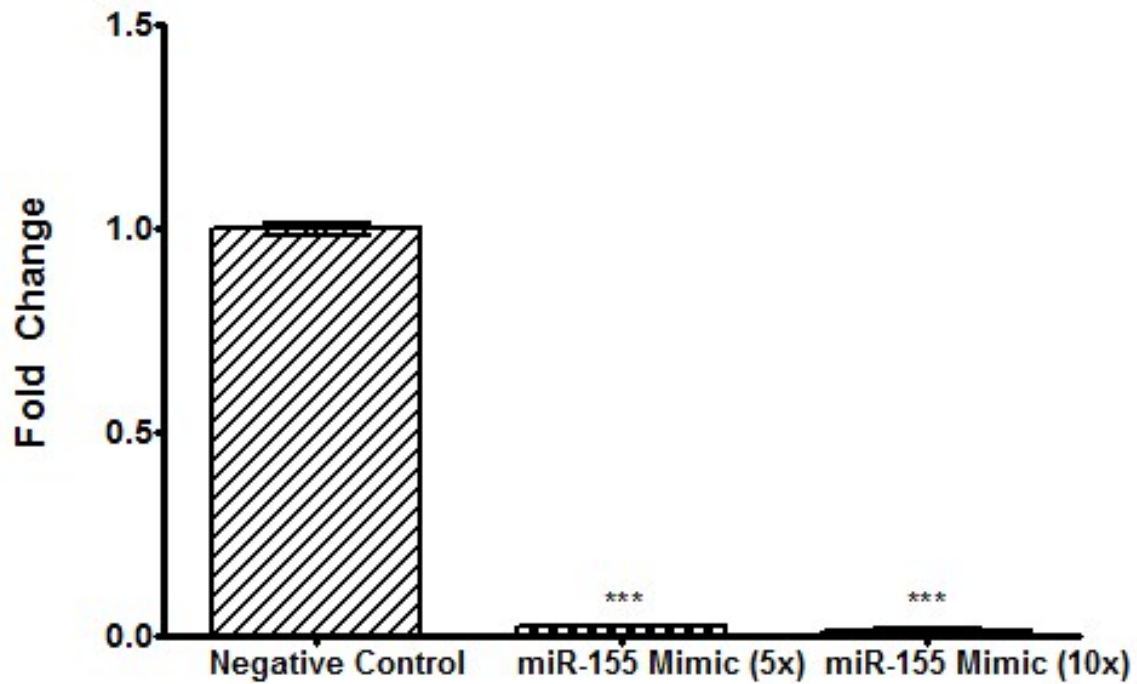

**Supplemental Figure 1. Optimization of miR-155 Mimic.** Neuronal co-cultures were transfected with a miR-155 mimic and RNA was isolated to evaluate expression of *Tnf-α* using qPCR. Expression of *Tnf-α* following miR-155 mimic transfection was significantly reduced by both the 5x (125 pmol) and 10x (250 pmol) concentrations indicating successful transfection of miR-155. An \* represents if the p value <0.05, \*\* if the p value <0.01, and \*\*\* if the p value <0.001 when compared to the control.

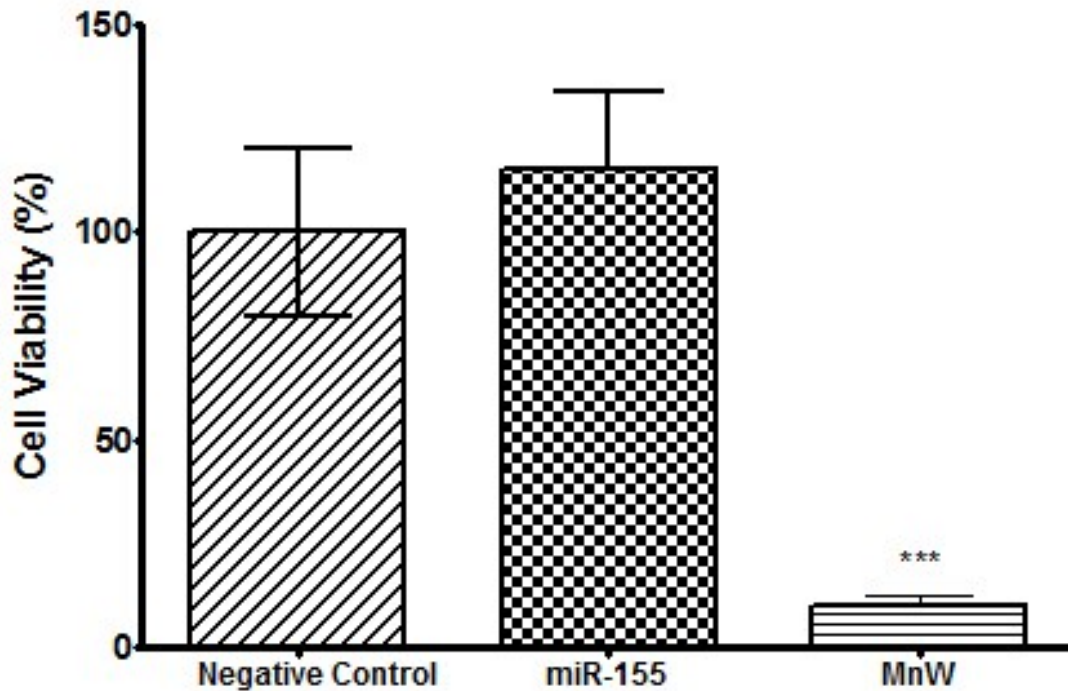

**Supplemental Figure 2. Cell Viability 72 hours Post-transfection of the 5x miR-155 mimic.** Neuronal co-cultures were transfected with a 5x (125 pmol) miR-155 mimic for 72 h or treated with a weekly dose of manganese nanoparticles for 24 h (positive control). Following treatment cell viability was analyzed using the MTS assay. There was no difference in cell viability for the untreated neuronal co-cultures and the miR-155 transfected co-cultures, indicating that the mimic was not toxic. An \* represents if the p value <0.05, \*\* if the p value <0.01, and \*\*\* if the p value <0.001 when compared to the control.

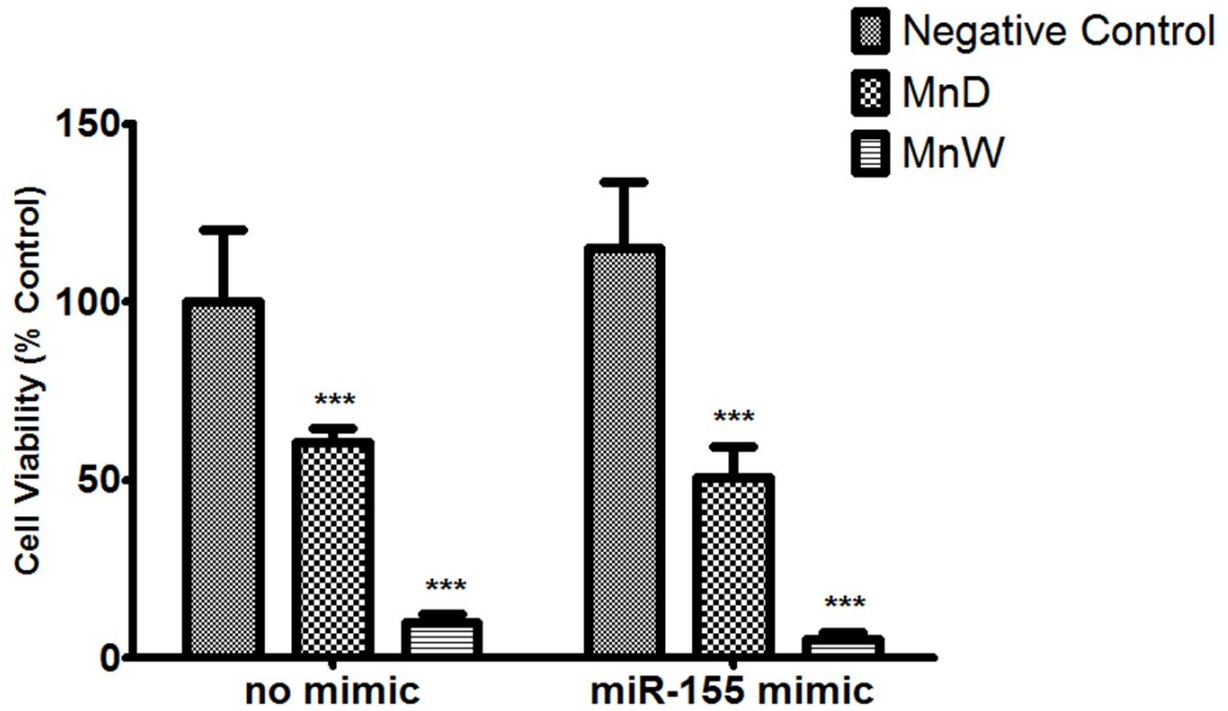

**Supplemental Figure 3. Cell Viability Following 72 Post Transfection with the 5x miR-155 mimic and Mn Treatment.** Neuronal co-cultures were transfected with a 5x (125 pmol) miR-155 mimic for 72 h and then dosed with the daily and weekly doses of Mn NPs for 24 h. Following treatment cell viability was analyzed using the MTS assay. Cell viability did not change between the treatments groups when miR-155 expression was restored. An \* represents if the p value <0.05, \*\* if the p value <0.01, and \*\*\* if the p value <0.001 when compared to the control.

**Table S1. Up-regulated Genes Unique to the MnD Treatment**

| <b>Gene Symbol</b> | <b>Fold Change</b> | <b>Gene Symbol</b> | <b>Fold Change</b> |
|--------------------|--------------------|--------------------|--------------------|
| mmu-miR-6987-5p    | 15.09              | mmu-miR-6899-3p    | 4.01               |
| mmu-miR-1964-3p    | 11.59              | mmu-miR-193b-5p    | 3.98               |
| mmu-miR-7038-5p    | 11.18              | mmu-miR-1966-5p    | 3.94               |
| mmu-miR-344g-5p    | 11.04              | mmu-miR-7090-3p    | 3.92               |
| mmu-miR-7081-3p    | 10.03              | mmu-miR-7049-5p    | 3.89               |
| mmu-miR-219a-2-3p  | 8.80               | mmu-miR-455-3p     | 3.88               |
| mmu-miR-6916-5p    | 8.28               | mmu-miR-6403       | 3.87               |
| mmu-miR-6927-5p    | 7.77               | mmu-miR-7226-5p    | 3.85               |
| mmu-miR-196a-2-3p  | 7.39               | mmu-miR-2139       | 3.81               |
| mmu-miR-7687-5p    | 6.96               | mmu-miR-1264-3p    | 3.75               |
| mmu-miR-7666-3p    | 6.50               | mmu-miR-3063-3p    | 3.68               |
| mmu-miR-3073a-3p   | 6.47               | mmu-miR-7010-5p    | 3.64               |
| mmu-miR-7039-3p    | 6.41               | mmu-miR-491-5p     | 3.62               |
| mmu-miR-6973a-3p   | 6.30               | mmu-miR-6921-5p    | 3.60               |
| mmu-miR-1231-3p    | 6.24               | mmu-miR-6953-5p    | 3.59               |
| mmu-miR-7676-3p    | 6.15               | mmu-miR-1957b      | 3.59               |
| mmu-miR-6354       | 6.11               | mmu-miR-7226-3p    | 3.56               |
| mmu-miR-3108-5p    | 6.07               | mmu-miR-3103-3p    | 3.56               |
| mmu-miR-760-3p     | 5.91               | mmu-miR-6919-3p    | 3.56               |
| mmu-miR-7213-5p    | 5.72               | mmu-miR-7686-3p    | 3.47               |
| mmu-miR-8096       | 5.70               | mmu-miR-6362       | 3.44               |
| mmu-miR-218-2-3p   | 5.63               | mmu-miR-194-1-3p   | 3.42               |
| mmu-miR-6960-5p    | 5.62               | mmu-miR-5129-3p    | 3.42               |
| mmu-miR-7018-3p    | 5.55               | mmu-miR-7071-3p    | 3.41               |
| mmu-miR-7010-3p    | 5.54               | mmu-miR-7118-3p    | 3.39               |
| mmu-miR-7049-3p    | 5.46               | mmu-miR-3110-3p    | 3.39               |
| mmu-miR-688        | 5.05               | mmu-miR-3088-5p    | 3.39               |
| mmu-miR-3470b      | 4.80               | mmu-miR-26a-1-3p   | 3.34               |
| mmu-miR-683        | 4.75               | mmu-miR-6969-5p    | 3.33               |
| mmu-miR-1943-3p    | 4.73               | mmu-miR-344f-3p    | 3.32               |
| mmu-miR-7079-3p    | 4.66               | mmu-let-7k         | 3.30               |
| mmu-miR-532-5p     | 4.58               | mmu-miR-6962-5p    | 3.29               |
| mmu-miR-6972-3p    | 4.56               | mmu-miR-7235-3p    | 3.27               |
| mmu-miR-199b-5p    | 4.55               | mmu-miR-3092-5p    | 3.27               |
| mmu-miR-7683-3p    | 4.55               | mmu-miR-7687-3p    | 3.27               |
| mmu-miR-1906       | 4.46               | mmu-miR-6999-5p    | 3.25               |
| mmu-miR-291b-3p    | 4.46               | mmu-miR-187-3p     | 3.25               |
| mmu-miR-1948-3p    | 4.45               | mmu-miR-344i       | 3.24               |
| mmu-miR-6899-5p    | 4.43               | mmu-miR-3552       | 3.23               |
| mmu-miR-3569-5p    | 4.43               | mmu-miR-6977-5p    | 3.22               |
| mmu-miR-290a-3p    | 4.37               | mmu-miR-146a-3p    | 3.21               |
| mmu-miR-1907       | 4.33               | mmu-miR-152-5p     | 3.20               |
| mmu-miR-7035-3p    | 4.33               | mmu-miR-344g-3p    | 3.20               |
| mmu-miR-7025-3p    | 4.16               | mmu-miR-692        | 3.19               |
| mmu-miR-219b-3p    | 4.14               | mmu-miR-7032-3p    | 3.19               |
| mmu-miR-3080-5p    | 4.09               | mmu-miR-6901-5p    | 3.19               |
| mmu-miR-6922-3p    | 4.04               | mmu-miR-203-5p     | 3.15               |

| Gene Symbol       | Fold Change | Gene Symbol      | Fold Change |
|-------------------|-------------|------------------|-------------|
| mmu-miR-6989-5p   | 3.14        | mmu-miR-718      | 2.59        |
| mmu-miR-192-3p    | 3.13        | mmu-miR-7062-5p  | 2.58        |
| mmu-miR-7242-3p   | 3.12        | mmu-miR-695      | 2.58        |
| mmu-miR-7016-5p   | 3.08        | mmu-miR-6407     | 2.56        |
| mmu-miR-7662-3p   | 3.06        | mmu-miR-7017-5p  | 2.56        |
| mmu-miR-770-5p    | 3.04        | mmu-miR-676-3p   | 2.56        |
| mmu-miR-344h-3p   | 3.04        | mmu-miR-7229-3p  | 2.55        |
| mmu-miR-7672-3p   | 3.03        | mmu-miR-6989-3p  | 2.54        |
| mmu-miR-3088-3p   | 3.02        | mmu-miR-6364     | 2.53        |
| mmu-miR-6994-5p   | 3.02        | mmu-miR-370-5p   | 2.51        |
| mmu-miR-1903      | 2.98        | mmu-miR-544-5p   | 2.51        |
| mmu-miR-126a-3p   | 2.97        | mmu-miR-3099-5p  | 2.50        |
| mmu-miR-18b-3p    | 2.95        | mmu-miR-5626-5p  | 2.49        |
| mmu-miR-5114      | 2.95        | mmu-miR-133b-5p  | 2.49        |
| mmu-miR-879-5p    | 2.95        | mmu-miR-6414     | 2.48        |
| mmu-miR-7656-3p   | 2.93        | mmu-miR-7022-3p  | 2.47        |
| mmu-miR-7230-3p   | 2.90        | mmu-miR-7067-3p  | 2.46        |
| mmu-miR-6952-5p   | 2.90        | mmu-miR-6918-5p  | 2.45        |
| mmu-miR-6962-3p   | 2.89        | mmu-miR-138-1-3p | 2.44        |
| mmu-miR-184-3p    | 2.89        | mmu-miR-7031-5p  | 2.44        |
| mmu-miR-582-3p    | 2.88        | mmu-miR-6933-5p  | 2.43        |
| mmu-miR-377-5p    | 2.87        | mmu-miR-7677-3p  | 2.42        |
| mmu-miR-3079-5p   | 2.86        | mmu-miR-1930-3p  | 2.42        |
| mmu-miR-7072-3p   | 2.85        | mmu-miR-6913-3p  | 2.41        |
| mmu-miR-7217-5p   | 2.84        | mmu-miR-200a-5p  | 2.41        |
| mmu-miR-7050-5p   | 2.84        | mmu-miR-8111     | 2.40        |
| mmu-miR-500-3p    | 2.84        | mmu-miR-666-3p   | 2.39        |
| mmu-miR-291b-5p   | 2.84        | mmu-miR-667-5p   | 2.38        |
| mmu-miR-6961-5p   | 2.83        | mmu-miR-7228-5p  | 2.37        |
| mmu-miR-1970      | 2.82        | mmu-miR-6999-3p  | 2.36        |
| mmu-miR-1231-5p   | 2.80        | mmu-miR-7002-5p  | 2.36        |
| mmu-miR-6947-3p   | 2.78        | mmu-miR-7088-3p  | 2.35        |
| mmu-miR-3105-5p   | 2.74        | mmu-miR-681      | 2.34        |
| mmu-miR-6996-5p   | 2.73        | mmu-miR-7018-5p  | 2.34        |
| mmu-miR-7014-3p   | 2.73        | mmu-miR-204-5p   | 2.33        |
| mmu-miR-7011-3p   | 2.71        | mmu-miR-6963-3p  | 2.33        |
| mmu-miR-697       | 2.68        | mmu-miR-1943-5p  | 2.33        |
| mmu-miR-6978-3p   | 2.68        | mmu-miR-210-5p   | 2.33        |
| mmu-miR-7077-5p   | 2.67        | mmu-miR-6947-5p  | 2.33        |
| mmu-miR-7238-5p   | 2.67        | mmu-miR-1930-5p  | 2.32        |
| mmu-miR-1928      | 2.64        | mmu-miR-6907-5p  | 2.30        |
| mmu-miR-125b-1-3p | 2.63        | mmu-miR-6917-3p  | 2.30        |
| mmu-miR-7081-5p   | 2.63        | mmu-miR-6973b-3p | 2.29        |
| mmu-miR-208b-5p   | 2.63        | mmu-miR-574-5p   | 2.28        |
| mmu-miR-6928-3p   | 2.62        | mmu-miR-6237     | 2.27        |
| mmu-miR-7008-5p   | 2.61        | mmu-miR-758-3p   | 2.27        |
| mmu-miR-7043-5p   | 2.60        | mmu-miR-488-3p   | 2.27        |

| Gene Symbol     | Fold Change | Gene Symbol       | Fold Change |
|-----------------|-------------|-------------------|-------------|
| mmu-miR-6349    | 2.26        | mmu-miR-3070-3p   | 2.10        |
| mmu-miR-7234-5p | 2.26        | mmu-miR-6929-5p   | 2.10        |
| mmu-miR-574-3p  | 2.26        | mmu-miR-7022-5p   | 2.10        |
| mmu-miR-6408    | 2.25        | mmu-miR-6374      | 2.10        |
| mmu-miR-691     | 2.25        | mmu-miR-3969      | 2.10        |
| mmu-miR-99a-3p  | 2.24        | mmu-miR-7069-3p   | 2.09        |
| mmu-miR-7652-5p | 2.24        | mmu-miR-6991-5p   | 2.09        |
| mmu-miR-30b-3p  | 2.24        | mmu-miR-701-5p    | 2.08        |
| mmu-miR-301b-5p | 2.24        | mmu-miR-7053-5p   | 2.08        |
| mmu-miR-3091-5p | 2.23        | mmu-miR-8094      | 2.07        |
| mmu-miR-6356    | 2.23        | mmu-miR-145b      | 2.07        |
| mmu-miR-7678-5p | 2.23        | mmu-miR-5709-5p   | 2.07        |
| mmu-miR-181c-3p | 2.23        | mmu-miR-599       | 2.07        |
| mmu-miR-6909-5p | 2.23        | mmu-miR-103-1-5p  | 2.06        |
| mmu-miR-6418-3p | 2.22        | mmu-miR-135a-1-3p | 2.06        |
| mmu-miR-431-3p  | 2.22        | mmu-miR-6905-3p   | 2.05        |
| mmu-miR-31-5p   | 2.21        | mmu-miR-218-1-3p  | 2.04        |
| mmu-miR-1251-3p | 2.20        | mmu-miR-6936-5p   | 2.04        |
| mmu-miR-216c-5p | 2.20        | mmu-miR-485-3p    | 2.02        |
| mmu-miR-7069-5p | 2.19        | mmu-miR-694       | 2.02        |
| mmu-miR-6900-5p | 2.19        | mmu-miR-686       | 2.01        |
| mmu-miR-486a-3p | 2.18        | mmu-miR-412-3p    | 2.01        |
| mmu-miR-7684-5p | 2.16        | mmu-miR-5709-5p   | 2.07        |
| mmu-miR-3093-3p | 2.15        | mmu-miR-599       | 2.07        |
| mmu-miR-6944-3p | 2.15        | mmu-miR-103-1-5p  | 2.06        |
| mmu-miR-449b    | 2.15        | mmu-miR-135a-1-3p | 2.06        |
| mmu-miR-325-5p  | 2.14        | mmu-miR-6905-3p   | 2.05        |
| mmu-miR-7689-3p | 2.14        | mmu-miR-218-1-3p  | 2.04        |
| mmu-miR-7062-3p | 2.14        | mmu-miR-6936-5p   | 2.04        |
| mmu-miR-7682-5p | 2.13        | mmu-miR-485-3p    | 2.02        |
| mmu-miR-5132-3p | 2.13        | mmu-miR-694       | 2.02        |
| mmu-miR-1195    | 2.13        | mmu-miR-686       | 2.01        |
| mmu-miR-6980-3p | 2.12        | mmu-miR-412-3p    | 2.01        |
| mmu-miR-193a-3p | 2.12        | mmu-miR-1982-3p   | 2.00        |

Table S2. Down-regulated Genes Unique to the MnD Treatment

| Gene Symbol     | Fold Change | Gene Symbol       | Fold Change |
|-----------------|-------------|-------------------|-------------|
| mmu-miR-290b-5p | -13.33      | mmu-miR-1a-3p     | -2.21       |
| mmu-miR-129b-5p | -5.12       | mmu-miR-92a-3p    | -2.18       |
| mmu-miR-106b-5p | -2.91       | mmu-miR-21a-5p    | -2.17       |
| mmu-miR-374c-3p | -2.66       | mmu-miR-669b-3p   | -2.12       |
| mmu-miR-142a-5p | -2.56       | mmu-miR-721       | -2.11       |
| mmu-miR-29a-3p  | -2.53       | mmu-miR-466b-5p   | -2.11       |
| mmu-miR-30c-5p  | -2.50       | mmu-miR-101a-3p   | -2.11       |
| mmu-miR-30e-5p  | -2.47       | mmu-miR-155-5p    | -2.08       |
| mmu-miR-3065-5p | -2.47       | mmu-miR-466k      | -2.07       |
| mmu-miR-875-3p  | -2.45       | mmu-miR-142b      | -2.05       |
| mmu-miR-26a-5p  | -2.39       | mmu-miR-3074-2-3p | -2.05       |
| mmu-miR-872-5p  | -2.25       | mmu-miR-139-5p    | -2.04       |
| mmu-miR-196b-5p | -2.22       | mmu-miR-185-5p    | -2.03       |

**Table S3. Up-regulated Genes Unique to the MnW Treatment**



| Gene Symbol     | Fold Change | Gene Symbol       | Fold Change |
|-----------------|-------------|-------------------|-------------|
| mmu-miR-337-3p  | 6.81        | mmu-miR-3473b     | 2.55        |
| mmu-miR-6239    | 6.16        | mmu-miR-497a-5p   | 2.51        |
| mmu-miR-7065-3p | 5.73        | mmu-miR-344c-5p   | 2.49        |
| mmu-miR-302d-3p | 5.11        | mmu-miR-690       | 2.48        |
| mmu-miR-7651-3p | 5.09        | mmu-miR-466f      | 2.47        |
| mmu-miR-3620-3p | 4.79        | mmu-miR-5619-5p   | 2.46        |
| mmu-miR-8093    | 4.59        | mmu-miR-6912-5p   | 2.45        |
| mmu-miR-3097-5p | 4.53        | mmu-miR-7007-3p   | 2.42        |
| mmu-miR-6995-3p | 4.39        | mmu-miR-669d-2-3p | 2.38        |
| mmu-miR-6964-5p | 4.05        | mmu-miR-365-1-5p  | 2.37        |
| mmu-miR-7224-3p | 4.05        | mmu-miR-218-5p    | 2.37        |
| mmu-miR-719     | 3.89        | mmu-miR-30c-1-3p  | 2.37        |
| mmu-miR-7116-3p | 3.81        | mmu-miR-3090-5p   | 2.37        |
| mmu-miR-7092-3p | 3.70        | mmu-miR-7236-5p   | 2.37        |
| mmu-miR-3066-5p | 3.58        | mmu-miR-3078-5p   | 2.36        |
| mmu-miR-367-3p  | 3.48        | mmu-miR-6937-5p   | 2.36        |
| mmu-miR-672-5p  | 3.46        | mmu-miR-3103-5p   | 2.36        |
| mmu-miR-5126    | 3.43        | mmu-miR-669k-5p   | 2.35        |
| mmu-miR-3473c   | 3.07        | mmu-miR-7054-5p   | 2.34        |
| mmu-miR-122-5p  | 3.03        | mmu-miR-383-5p    | 2.33        |
| mmu-miR-7035-5p | 2.96        | mmu-miR-6931-5p   | 2.33        |
| mmu-miR-467f    | 2.92        | mmu-miR-8103      | 2.32        |
| mmu-miR-6948-3p | 2.90        | mmu-miR-489-3p    | 2.29        |
| mmu-miR-3970    | 2.89        | mmu-miR-7116-5p   | 2.28        |
| mmu-miR-1892    | 2.80        | mmu-miR-1929-5p   | 2.28        |
| mmu-miR-5098    | 2.79        | mmu-miR-344h-5p   | 2.27        |
| mmu-miR-6390    | 2.78        | mmu-miR-6960-3p   | 2.27        |
| mmu-miR-6933-3p | 2.78        | mmu-miR-6979-5p   | 2.24        |
| mmu-miR-7013-5p | 2.76        | mmu-miR-6969-3p   | 2.24        |
| mmu-miR-1934-3p | 2.75        | mmu-miR-3572-3p   | 2.24        |
| mmu-miR-329-3p  | 2.73        | mmu-miR-7085-3p   | 2.21        |
| mmu-miR-7117-3p | 2.72        | mmu-miR-302a-3p   | 2.21        |
| mmu-miR-292b-3p | 2.71        | mmu-miR-7688-3p   | 2.19        |
| mmu-miR-6915-5p | 2.70        | mmu-miR-93-3p     | 2.19        |
| mmu-miR-466l-5p | 2.70        | mmu-miR-381-3p    | 2.17        |
| mmu-miR-1224-3p | 2.70        | mmu-miR-496a-5p   | 2.16        |
| mmu-miR-669d-3p | 2.63        | mmu-miR-329-5p    | 2.15        |
| mmu-miR-669h-3p | 2.59        | mmu-miR-376b-5p   | 2.14        |
| mmu-miR-6980-5p | 2.59        | mmu-miR-8108      | 2.14        |
| mmu-miR-7068-5p | 2.58        | mmu-miR-6348      | 2.13        |
| mmu-miR-202-5p  | 2.58        | mmu-miR-7061-3p   | 2.13        |
| mmu-miR-7047-5p | 2.56        | mmu-miR-3473e     | 2.12        |
| mmu-miR-497b    | 2.56        | mmu-miR-9-5p      | 2.11        |
| mmu-miR-3473b   | 6.81        | mmu-miR-133a-3p   | 2.11        |
| mmu-miR-497a-5p | 6.16        | mmu-miR-6906-5p   | 2.11        |

| Gene Symbol    | Fold Change | Gene Symbol     | Fold Change |
|----------------|-------------|-----------------|-------------|
| mmu-miR-186-3p | 2.10        | mmu-miR-6983-5p | 2.05        |

|                         |      |                        |      |
|-------------------------|------|------------------------|------|
| <b>mmu-miR-376c-5p</b>  | 2.10 | <b>mmu-miR-210-3p</b>  | 2.05 |
| <b>mmu-miR-7068-3p</b>  | 2.10 | <b>mmu-miR-1897-5p</b> | 2.04 |
| <b>mmu-miR-7230-5p</b>  | 2.09 | <b>mmu-miR-6401</b>    | 2.04 |
| <b>mmu-miR-33-5p</b>    | 2.08 | <b>mmu-miR-32-5p</b>   | 2.04 |
| <b>mmu-miR-92a-2-5p</b> | 2.07 | <b>mmu-miR-298-3p</b>  | 2.03 |
| <b>mmu-miR-3069-3p</b>  | 2.06 | <b>mmu-miR-6406</b>    | 2.03 |
| <b>mmu-miR-202-3p</b>   | 2.06 | <b>mmu-miR-6993-3p</b> | 2.01 |
| <b>mmu-miR-7088-5p</b>  | 2.06 | <b>mmu-miR-8091</b>    | 2.00 |

**Table S4. Down-regulated Genes Unique to the MnW Treatment**

| Gene Symbol       | Fold Change | Gene Symbol       | Fold Change |
|-------------------|-------------|-------------------|-------------|
| mmu-miR-299b-5p   | -43.37      | mmu-miR-489-5p    | -2.47       |
| mmu-miR-24-1-5p   | -6.66       | mmu-miR-34c-3p    | -2.36       |
| mmu-miR-1a-2-5p   | -6.07       | mmu-miR-542-5p    | -2.35       |
| mmu-miR-130b-3p   | -5.37       | mmu-miR-466o-3p   | -2.35       |
| mmu-miR-6399      | -4.98       | mmu-miR-338-3p    | -2.34       |
| mmu-miR-465d-5p   | -4.61       | mmu-miR-3071-5p   | -2.33       |
| mmu-miR-1298-3p   | -3.71       | mmu-miR-5710      | -2.33       |
| mmu-miR-6398      | -3.52       | mmu-miR-1971      | -2.28       |
| mmu-miR-181b-1-3p | -3.52       | mmu-miR-1936      | -2.28       |
| mmu-miR-6902-3p   | -3.42       | mmu-miR-544-3p    | -2.26       |
| mmu-miR-6981-3p   | -3.36       | mmu-miR-215-5p    | -2.23       |
| mmu-miR-3544-5p   | -3.33       | mmu-miR-713       | -2.23       |
| mmu-miR-144-5p    | -3.29       | mmu-miR-146b-5p   | -2.22       |
| mmu-miR-200b-3p   | -3.21       | mmu-miR-135a-2-3p | -2.21       |
| mmu-miR-3057-3p   | -3.15       | mmu-miR-3618-3p   | -2.21       |
| mmu-miR-181b-2-3p | -3.10       | mmu-miR-6244      | -2.19       |
| mmu-miR-6341      | -3.08       | mmu-miR-344b-5p   | -2.19       |
| mmu-miR-410-5p    | -3.04       | mmu-miR-6942-5p   | -2.18       |
| mmu-miR-698-5p    | -3.02       | mmu-miR-802-3p    | -2.18       |
| mmu-miR-592-3p    | -3.01       | mmu-miR-677-5p    | -2.18       |
| mmu-miR-700-5p    | -2.99       | mmu-miR-297b-5p   | -2.18       |
| mmu-miR-499-3p    | -2.98       | mmu-miR-7b-3p     | -2.17       |
| mmu-miR-592-5p    | -2.96       | mmu-miR-7646-5p   | -2.16       |
| mmu-miR-6908-3p   | -2.93       | mmu-miR-7219-5p   | -2.14       |
| mmu-miR-18b-5p    | -2.92       | mmu-miR-34c-5p    | -2.13       |
| mmu-miR-6992-3p   | -2.90       | mmu-miR-509-5p    | -2.13       |
| mmu-miR-5616-3p   | -2.86       | mmu-miR-338-5p    | -2.12       |
| mmu-miR-496b      | -2.81       | mmu-miR-24-2-5p   | -2.12       |
| mmu-miR-5104      | -2.80       | mmu-miR-466l-3p   | -2.10       |
| mmu-miR-6355      | -2.79       | mmu-miR-6994-3p   | -2.09       |
| mmu-miR-468-5p    | -2.70       | mmu-miR-693-3p    | -2.09       |
| mmu-miR-876-5p    | -2.67       | mmu-miR-144-3p    | -2.09       |
| mmu-miR-669e-3p   | -2.65       | mmu-miR-6516-5p   | -2.09       |
| mmu-miR-598-3p    | -2.63       | mmu-miR-764-5p    | -2.06       |
| mmu-miR-302b-5p   | -2.59       | mmu-miR-129-1-3p  | -2.05       |
| mmu-miR-101c      | -2.51       | mmu-miR-214-3p    | -2.04       |
| mmu-miR-449c-5p   | -2.51       | mmu-miR-674-5p    | -2.04       |
| mmu-miR-6539      | -2.49       | mmu-miR-20b-3p    | -2.03       |
| mmu-miR-101a-5p   | -2.49       | mmu-miR-5124b     | -2.03       |

**Table S5. Up-regulated Genes Linked to Mn Treatment**

| <b>Gene Symbol</b> | <b>MnD Fold Change</b> | <b>MnW Fold Change</b> |
|--------------------|------------------------|------------------------|
| mmu-miR-7044-5p    | 6.24                   | 28.90                  |
| mmu-miR-7086-5p    | 5.32                   | 13.59                  |
| mmu-miR-467b-3p    | 2.04                   | 13.19                  |
| mmu-miR-7009-5p    | 7.00                   | 11.74                  |
| mmu-miR-673-5p     | 18.42                  | 11.60                  |
| mmu-miR-3109-5p    | 12.37                  | 11.60                  |
| mmu-miR-6979-3p    | 9.69                   | 11.14                  |
| mmu-miR-7118-5p    | 3.15                   | 10.83                  |
| mmu-miR-7682-3p    | 4.99                   | 10.61                  |
| mmu-miR-1982-5p    | 7.16                   | 10.42                  |
| mmu-miR-873a-3p    | 4.14                   | 10.28                  |
| mmu-miR-7006-5p    | 2.43                   | 10.21                  |
| mmu-miR-7001-5p    | 8.32                   | 9.96                   |
| mmu-miR-3100-5p    | 4.72                   | 9.84                   |
| mmu-miR-7119-5p    | 5.13                   | 9.81                   |
| mmu-miR-6914-5p    | 7.18                   | 9.63                   |
| mmu-miR-706        | 2.88                   | 9.37                   |
| mmu-miR-7089-3p    | 10.10                  | 9.28                   |
| mmu-miR-3113-3p    | 5.54                   | 9.27                   |
| mmu-miR-7115-5p    | 7.96                   | 8.51                   |
| mmu-miR-7025-5p    | 9.50                   | 8.23                   |
| mmu-miR-7085-5p    | 5.09                   | 8.10                   |
| mmu-miR-1968-3p    | 10.68                  | 8.06                   |
| mmu-miR-6240       | 3.39                   | 7.85                   |
| mmu-miR-7240-3p    | 3.87                   | 7.82                   |
| mmu-miR-6366       | 6.97                   | 7.82                   |
| mmu-miR-6387       | 5.54                   | 7.46                   |
| mmu-miR-8117       | 6.81                   | 7.34                   |
| mmu-miR-7048-5p    | 12.97                  | 7.26                   |
| mmu-miR-6972-5p    | 5.39                   | 7.26                   |
| mmu-miR-5615-5p    | 3.72                   | 7.23                   |
| mmu-miR-7089-5p    | 10.78                  | 7.16                   |
| mmu-miR-6974-5p    | 2.89                   | 7.10                   |
| mmu-miR-6927-3p    | 11.72                  | 6.93                   |
| mmu-miR-7034-5p    | 7.97                   | 6.93                   |
| mmu-miR-675-5p     | 8.31                   | 6.84                   |
| mmu-miR-7239-5p    | 6.95                   | 6.69                   |
| mmu-miR-1931       | 6.54                   | 6.53                   |
| mmu-miR-8101       | 4.42                   | 6.43                   |
| mmu-miR-1188-3p    | 3.94                   | 6.42                   |

| <b>Gene Symbol</b> | <b>MnD Fold Change</b> | <b>MnW Fold Change</b> |
|--------------------|------------------------|------------------------|
|--------------------|------------------------|------------------------|

|                          |       |      |
|--------------------------|-------|------|
| <b>mmu-miR-7004-5p</b>   | 7.16  | 6.28 |
| <b>mmu-miR-1947-5p</b>   | 4.71  | 6.26 |
| <b>mmu-miR-6965-5p</b>   | 4.86  | 6.20 |
| <b>mmu-miR-5132-5p</b>   | 3.36  | 6.15 |
| <b>mmu-miR-185-3p</b>    | 7.72  | 6.12 |
| <b>mmu-miR-6970-5p</b>   | 5.15  | 6.10 |
| <b>mmu-miR-1900</b>      | 7.40  | 6.04 |
| <b>mmu-miR-6365</b>      | 3.93  | 5.96 |
| <b>mmu-miR-292a-5p</b>   | 2.58  | 5.96 |
| <b>mmu-miR-760-5p</b>    | 8.61  | 5.92 |
| <b>mmu-miR-5627-3p</b>   | 18.37 | 5.92 |
| <b>mmu-miR-874-5p</b>    | 5.89  | 5.83 |
| <b>mmu-miR-3064-5p</b>   | 2.89  | 5.76 |
| <b>mmu-miR-5103</b>      | 3.66  | 5.75 |
| <b>mmu-miR-133b-3p</b>   | 2.91  | 5.75 |
| <b>mmu-miR-7654-3p</b>   | 5.11  | 5.70 |
| <b>mmu-miR-375-5p</b>    | 3.13  | 5.68 |
| <b>mmu-miR-5623-3p</b>   | 2.19  | 5.67 |
| <b>mmu-miR-290a-5p</b>   | 3.23  | 5.59 |
| <b>mmu-miR-6936-3p</b>   | 8.42  | 5.59 |
| <b>mmu-miR-7080-5p</b>   | 2.30  | 5.54 |
| <b>mmu-miR-1199-3p</b>   | 5.89  | 5.53 |
| <b>mmu-miR-3074-1-3p</b> | 5.63  | 5.53 |
| <b>mmu-miR-30e-3p</b>    | 10.81 | 5.49 |
| <b>mmu-miR-6982-3p</b>   | 8.86  | 5.45 |
| <b>mmu-miR-5131</b>      | 5.02  | 5.45 |
| <b>mmu-miR-3473g</b>     | 2.15  | 5.40 |
| <b>mmu-miR-7119-3p</b>   | 2.27  | 5.37 |
| <b>mmu-miR-3073b-3p</b>  | 6.03  | 5.34 |
| <b>mmu-miR-346-3p</b>    | 4.79  | 5.31 |
| <b>mmu-miR-3078-3p</b>   | 4.47  | 5.27 |
| <b>mmu-miR-7036b-5p</b>  | 4.36  | 5.25 |
| <b>mmu-miR-6382</b>      | 3.11  | 5.25 |
| <b>mmu-miR-1192</b>      | 3.64  | 5.23 |
| <b>mmu-miR-7231-5p</b>   | 3.03  | 5.19 |
| <b>mmu-miR-6897-3p</b>   | 5.01  | 5.15 |
| <b>mmu-miR-7036b-3p</b>  | 3.62  | 5.15 |
| <b>mmu-miR-3061-5p</b>   | 4.69  | 5.11 |
| <b>mmu-miR-320-5p</b>    | 5.31  | 5.08 |
| <b>mmu-miR-7078-5p</b>   | 3.86  | 5.07 |

| <b>Gene Symbol</b>       | <b>MnD Fold Change</b> | <b>MnW Fold Change</b> |
|--------------------------|------------------------|------------------------|
| <b>mmu-miR-7677-5p</b>   | 10.51                  | 5.06                   |
| <b>mmu-miR-5621-3p</b>   | 3.16                   | 5.03                   |
| <b>mmu-miR-7033-3p</b>   | 6.53                   | 5.02                   |
| <b>mmu-miR-5622-3p</b>   | 4.03                   | 5.01                   |
| <b>mmu-miR-1895</b>      | 3.18                   | 4.95                   |
| <b>mmu-miR-138-2-3p</b>  | 8.65                   | 4.94                   |
| <b>mmu-miR-615-5p</b>    | 2.44                   | 4.93                   |
| <b>mmu-miR-7070-5p</b>   | 5.45                   | 4.93                   |
| <b>mmu-miR-7075-5p</b>   | 2.27                   | 4.90                   |
| <b>mmu-miR-302c-3p</b>   | 2.30                   | 4.84                   |
| <b>mmu-miR-6958-5p</b>   | 4.94                   | 4.83                   |
| <b>mmu-miR-3102-5p</b>   | 3.63                   | 4.80                   |
| <b>mmu-miR-6368</b>      | 3.16                   | 4.78                   |
| <b>mmu-miR-1893</b>      | 5.56                   | 4.77                   |
| <b>mmu-miR-6968-5p</b>   | 4.81                   | 4.72                   |
| <b>mmu-miR-331-5p</b>    | 5.33                   | 4.71                   |
| <b>mmu-miR-7671-3p</b>   | 6.83                   | 4.71                   |
| <b>mmu-miR-219c-5p</b>   | 3.37                   | 4.69                   |
| <b>mmu-miR-208b-3p</b>   | 4.02                   | 4.67                   |
| <b>mmu-miR-3067-3p</b>   | 5.91                   | 4.65                   |
| <b>mmu-miR-200c-5p</b>   | 6.09                   | 4.62                   |
| <b>mmu-miR-6909-3p</b>   | 6.35                   | 4.62                   |
| <b>mmu-miR-219a-1-3p</b> | 5.02                   | 4.60                   |
| <b>mmu-miR-194-2-3p</b>  | 4.59                   | 4.58                   |
| <b>mmu-miR-5101</b>      | 2.78                   | 4.56                   |
| <b>mmu-miR-1905</b>      | 3.02                   | 4.56                   |
| <b>mmu-miR-6987-3p</b>   | 3.38                   | 4.55                   |
| <b>mmu-miR-6715-5p</b>   | 4.68                   | 4.52                   |
| <b>mmu-miR-6985-3p</b>   | 3.29                   | 4.52                   |
| <b>mmu-miR-216b-3p</b>   | -9.44                  | 4.51                   |
| <b>mmu-miR-6392-3p</b>   | 7.41                   | 4.50                   |
| <b>mmu-miR-7052-3p</b>   | 4.42                   | 4.50                   |
| <b>mmu-miR-7686-5p</b>   | 8.67                   | 4.45                   |
| <b>mmu-miR-6923-5p</b>   | 3.68                   | 4.45                   |
| <b>mmu-miR-7212-5p</b>   | 8.19                   | 4.45                   |
| <b>mmu-miR-6402</b>      | 3.93                   | 4.44                   |
| <b>mmu-miR-374b-5p</b>   | 6.47                   | 4.43                   |
| <b>mmu-miR-8112</b>      | 3.16                   | 4.43                   |
| <b>mmu-miR-7218-3p</b>   | 2.69                   | 4.40                   |
| <b>mmu-miR-6395</b>      | 2.81                   | 4.40                   |

| <b>Gene Symbol</b>     | <b>MnD Fold Change</b> | <b>MnW Fold Change</b> |
|------------------------|------------------------|------------------------|
| <b>mmu-miR-711</b>     | 3.07                   | 4.38                   |
| <b>mmu-miR-7007-5p</b> | 4.06                   | 4.34                   |
| <b>mmu-miR-6934-5p</b> | 3.95                   | 4.33                   |
| <b>mmu-miR-3960</b>    | 5.46                   | 4.30                   |
| <b>mmu-miR-8119</b>    | 5.94                   | 4.30                   |
| <b>mmu-miR-7223-3p</b> | 2.82                   | 4.29                   |
| <b>mmu-miR-5130</b>    | 6.04                   | 4.28                   |
| <b>mmu-miR-7216-3p</b> | 4.10                   | 4.27                   |
| <b>mmu-miR-6236</b>    | 12.43                  | 4.26                   |
| <b>mmu-miR-6945-5p</b> | 4.76                   | 4.26                   |
| <b>mmu-miR-6344</b>    | 2.11                   | 4.25                   |
| <b>mmu-miR-1954</b>    | 22.98                  | 4.25                   |
| <b>mmu-miR-1247-5p</b> | 4.19                   | 4.18                   |
| <b>mmu-miR-7087-5p</b> | 5.48                   | 4.17                   |
| <b>mmu-miR-149-3p</b>  | 5.37                   | 4.16                   |
| <b>mmu-miR-7648-5p</b> | 8.63                   | 4.15                   |
| <b>mmu-miR-6930-5p</b> | 4.28                   | 4.14                   |
| <b>mmu-miR-466i-5p</b> | 2.18                   | 4.11                   |
| <b>mmu-miR-7674-3p</b> | 28.56                  | 4.08                   |
| <b>mmu-miR-7028-3p</b> | 3.73                   | 4.07                   |
| <b>mmu-miR-294-3p</b>  | 4.11                   | 4.06                   |
| <b>mmu-miR-6409</b>    | 3.26                   | 4.04                   |
| <b>mmu-miR-6943-5p</b> | 2.39                   | 4.04                   |
| <b>mmu-miR-6908-5p</b> | 3.42                   | 4.03                   |
| <b>mmu-miR-206-3p</b>  | 2.19                   | 4.01                   |
| <b>mmu-miR-5100</b>    | 3.37                   | 4.00                   |
| <b>mmu-miR-7658-5p</b> | 6.64                   | 3.98                   |
| <b>mmu-miR-6997-5p</b> | 3.45                   | 3.96                   |
| <b>mmu-miR-7657-3p</b> | 2.61                   | 3.96                   |
| <b>mmu-miR-702-5p</b>  | 2.67                   | 3.94                   |
| <b>mmu-miR-7000-3p</b> | 5.51                   | 3.94                   |
| <b>mmu-miR-6372</b>    | 6.34                   | 3.92                   |
| <b>mmu-miR-6943-3p</b> | 4.58                   | 3.91                   |
| <b>mmu-miR-7211-5p</b> | 3.55                   | 3.88                   |
| <b>mmu-miR-7027-3p</b> | 3.54                   | 3.88                   |
| <b>mmu-miR-7669-3p</b> | 2.92                   | 3.87                   |
| <b>mmu-miR-8098</b>    | 5.52                   | 3.86                   |
| <b>mmu-miR-8113</b>    | 2.93                   | 3.84                   |
| <b>mmu-miR-7033-5p</b> | 5.02                   | 3.81                   |
| <b>mmu-miR-26b-3p</b>  | 3.01                   | 3.81                   |

| <b>Gene Symbol</b>      | <b>MnD Fold Change</b> | <b>MnW Fold Change</b> |
|-------------------------|------------------------|------------------------|
| <b>mmu-miR-7046-3p</b>  | 4.46                   | 3.79                   |
| <b>mmu-miR-3076-3p</b>  | 3.42                   | 3.77                   |
| <b>mmu-miR-6392-5p</b>  | 4.66                   | 3.76                   |
| <b>mmu-miR-935</b>      | 5.60                   | 3.74                   |
| <b>mmu-miR-7036a-5p</b> | 4.82                   | 3.73                   |
| <b>mmu-miR-3100-3p</b>  | 2.28                   | 3.72                   |
| <b>mmu-miR-6990-3p</b>  | 9.83                   | 3.70                   |
| <b>mmu-miR-6939-5p</b>  | 4.49                   | 3.70                   |
| <b>mmu-miR-5125</b>     | 11.47                  | 3.70                   |
| <b>mmu-miR-3072-3p</b>  | 2.08                   | 3.68                   |
| <b>mmu-miR-7076-5p</b>  | 11.17                  | 3.68                   |
| <b>mmu-miR-6238</b>     | 3.61                   | 3.67                   |
| <b>mmu-miR-7084-3p</b>  | 2.51                   | 3.66                   |
| <b>mmu-miR-6966-5p</b>  | 3.19                   | 3.66                   |
| <b>mmu-miR-7050-3p</b>  | 2.82                   | 3.66                   |
| <b>mmu-miR-6974-3p</b>  | 3.91                   | 3.64                   |
| <b>mmu-miR-5621-5p</b>  | 4.62                   | 3.64                   |
| <b>mmu-miR-323-5p</b>   | 5.24                   | 3.63                   |
| <b>mmu-miR-7019-5p</b>  | 2.82                   | 3.62                   |
| <b>mmu-miR-7679-3p</b>  | 3.64                   | 3.62                   |
| <b>mmu-miR-328-3p</b>   | 6.21                   | 3.61                   |
| <b>mmu-miR-6975-5p</b>  | 2.99                   | 3.61                   |
| <b>mmu-miR-6347</b>     | 3.74                   | 3.61                   |
| <b>mmu-miR-7087-3p</b>  | 2.14                   | 3.61                   |
| <b>mmu-miR-5133</b>     | 5.78                   | 3.61                   |
| <b>mmu-miR-9769-3p</b>  | 3.71                   | 3.60                   |
| <b>mmu-miR-7011-5p</b>  | 3.01                   | 3.59                   |
| <b>mmu-miR-539-5p</b>   | 2.57                   | 3.58                   |
| <b>mmu-miR-302c-5p</b>  | 6.45                   | 3.58                   |
| <b>mmu-miR-7064-3p</b>  | 5.41                   | 3.58                   |
| <b>mmu-miR-8102</b>     | 4.32                   | 3.57                   |
| <b>mmu-miR-486a-5p</b>  | 3.12                   | 3.56                   |
| <b>mmu-miR-7221-3p</b>  | 3.19                   | 3.55                   |
| <b>mmu-miR-6901-3p</b>  | 4.01                   | 3.55                   |
| <b>mmu-miR-615-3p</b>   | 3.08                   | 3.55                   |
| <b>mmu-miR-5107-5p</b>  | 5.58                   | 3.53                   |
| <b>mmu-miR-6405</b>     | 2.86                   | 3.53                   |
| <b>mmu-miR-7071-5p</b>  | 2.99                   | 3.49                   |
| <b>mmu-miR-6896-5p</b>  | 3.18                   | 3.48                   |
| <b>mmu-miR-7028-5p</b>  | 5.16                   | 3.48                   |



| <b>Gene Symbol</b> | <b>MnD Fold Change</b> | <b>MnW Fold Change</b> |
|--------------------|------------------------|------------------------|
| mmu-miR-7009-3p    | 5.62                   | 3.47                   |
| mmu-miR-1904       | 2.45                   | 3.45                   |
| mmu-miR-128-2-5p   | 3.20                   | 3.44                   |
| mmu-miR-6715-3p    | 4.03                   | 3.43                   |
| mmu-miR-5112       | 3.08                   | 3.42                   |
| mmu-miR-671-3p     | 10.45                  | 3.42                   |
| mmu-miR-491-3p     | 7.77                   | 3.42                   |
| mmu-miR-129-2-3p   | 20.99                  | 3.41                   |
| mmu-miR-7685-3p    | 15.65                  | 3.38                   |
| mmu-miR-1964-5p    | 4.30                   | 3.38                   |
| mmu-miR-7090-5p    | 2.49                   | 3.34                   |
| mmu-miR-7045-5p    | 2.84                   | 3.34                   |
| mmu-miR-7216-5p    | 2.26                   | 3.33                   |
| mmu-miR-7032-5p    | 4.13                   | 3.33                   |
| mmu-miR-7017-3p    | 3.16                   | 3.33                   |
| mmu-miR-3059-3p    | 4.25                   | 3.33                   |
| mmu-miR-6968-3p    | 2.83                   | 3.32                   |
| mmu-miR-7059-5p    | 2.59                   | 3.28                   |
| mmu-miR-7217-3p    | 5.94                   | 3.27                   |
| mmu-miR-7030-5p    | 5.24                   | 3.25                   |
| mmu-miR-3547-3p    | 2.44                   | 3.25                   |
| mmu-miR-6769b-5p   | 2.35                   | 3.25                   |
| mmu-miR-7648-3p    | 5.62                   | 3.24                   |
| mmu-miR-7689-5p    | 6.99                   | 3.23                   |
| mmu-miR-7082-5p    | 4.88                   | 3.21                   |
| mmu-miR-3154       | 5.18                   | 3.20                   |
| mmu-miR-146b-3p    | 5.30                   | 3.19                   |
| mmu-miR-134-3p     | 2.54                   | 3.19                   |
| mmu-miR-494-5p     | 8.73                   | 3.17                   |
| mmu-miR-3547-5p    | 2.53                   | 3.15                   |
| mmu-miR-7006-3p    | 4.31                   | 3.13                   |
| mmu-miR-3101-3p    | 5.13                   | 3.13                   |
| mmu-miR-182-3p     | 5.70                   | 3.12                   |
| mmu-miR-7012-3p    | 3.51                   | 3.11                   |
| mmu-miR-7215-3p    | 8.58                   | 3.11                   |
| mmu-miR-365-2-5p   | 2.44                   | 3.11                   |
| mmu-miR-3108-3p    | 4.03                   | 3.10                   |
| mmu-miR-328-5p     | 3.78                   | 3.10                   |
| mmu-miR-302a-5p    | 2.53                   | 3.09                   |
| mmu-miR-5134-3p    | 3.25                   | 3.09                   |

| <b>Gene Symbol</b>   | <b>MnD Fold Change</b> | <b>MnW Fold Change</b> |
|----------------------|------------------------|------------------------|
| mmu-miR-6988-5p      | 4.92                   | 3.07                   |
| mmu-miR-1193-5p      | 2.46                   | 3.06                   |
| mmu-miR-5135         | 2.90                   | 3.05                   |
| mmu-miR-7029-5p      | 6.79                   | 3.05                   |
| mmu-miR-7668-3p      | 3.23                   | 3.05                   |
| mmu-miR-1190         | 5.04                   | 3.04                   |
| mmu-miR-5627-5p      | 4.41                   | 3.04                   |
| mmu-miR-3085-5p      | 3.70                   | 3.03                   |
| mmu-miR-6973a-5p     | 3.15                   | 3.03                   |
| mmu-miR-3065-3p      | 2.45                   | 3.03                   |
| mmu-miR-7058-5p      | 5.88                   | 3.02                   |
| mmu-miR-3968         | 2.56                   | 3.02                   |
| mmu-miR-3474         | 3.34                   | 3.00                   |
| mmu-miR-1258-3p      | 3.16                   | 3.00                   |
| mmu-miR-709          | 3.99                   | 2.99                   |
| mmu-miR-1306-3p      | 3.02                   | 2.99                   |
| mmu-miR-7067-5p      | 6.32                   | 2.98                   |
| mmu-miR-6981-5p      | 4.49                   | 2.98                   |
| mmu-miR-207          | 2.61                   | 2.97                   |
| mmu-miR-1946b        | 5.13                   | 2.96                   |
| mmu-miR-7221-5p      | 9.08                   | 2.96                   |
| mmu-miR-300-3p       | 2.29                   | 2.95                   |
| mmu-miR-6940-5p      | 2.65                   | 2.95                   |
| mmu-miR-1894-3p      | 2.43                   | 2.94                   |
| mmu-miR-486b-3p      | 4.17                   | 2.94                   |
| mmu-miR-6352         | 3.07                   | 2.93                   |
| mmu-miR-378b         | 2.47                   | 2.92                   |
| mmu-miR-199a-5p      | 3.37                   | 2.92                   |
| mmu-miR-92b-5p       | 3.08                   | 2.91                   |
| mmu-miR-3072-5p      | 4.74                   | 2.91                   |
| mmu-miR-7042-5p      | 2.97                   | 2.91                   |
| mmu-miR-7075-3p      | 2.52                   | 2.90                   |
| mmu-miR-7083-3p      | 4.84                   | 2.89                   |
| mmu-miR-503-3p       | 3.36                   | 2.88                   |
| mmu-miR-6955-5p      | 2.42                   | 2.88                   |
| mmu-miR-3102-3p.2-3p | 4.67                   | 2.86                   |
| mmu-miR-1938         | 12.72                  | 2.86                   |
| mmu-miR-7223-5p      | 2.40                   | 2.85                   |
| mmu-miR-3113-5p      | 8.36                   | 2.85                   |
| mmu-miR-3061-3p      | 4.01                   | 2.84                   |

| <b>Gene Symbol</b>     | <b>MnD Fold Change</b> | <b>MnW Fold Change</b> |
|------------------------|------------------------|------------------------|
| <b>mmu-miR-23a-5p</b>  | 2.63                   | 2.84                   |
| <b>mmu-miR-8097</b>    | 4.34                   | 2.84                   |
| <b>mmu-miR-6396</b>    | 2.70                   | 2.84                   |
| <b>mmu-miR-3475-3p</b> | 2.76                   | 2.84                   |
| <b>mmu-miR-3077-3p</b> | 8.01                   | 2.84                   |
| <b>mmu-miR-770-3p</b>  | 6.41                   | 2.84                   |
| <b>mmu-miR-1224-5p</b> | 2.45                   | 2.83                   |
| <b>mmu-miR-1951</b>    | 3.02                   | 2.83                   |
| <b>mmu-miR-187-5p</b>  | 6.67                   | 2.82                   |
| <b>mmu-miR-6934-3p</b> | 3.17                   | 2.82                   |
| <b>mmu-miR-7671-5p</b> | 11.70                  | 2.81                   |
| <b>mmu-miR-6418-5p</b> | 3.84                   | 2.81                   |
| <b>mmu-miR-6970-3p</b> | 2.15                   | 2.81                   |
| <b>mmu-miR-6998-3p</b> | 3.55                   | 2.81                   |
| <b>mmu-miR-7659-5p</b> | 3.23                   | 2.80                   |
| <b>mmu-miR-195a-3p</b> | 5.74                   | 2.80                   |
| <b>mmu-miR-7670-3p</b> | 2.20                   | 2.79                   |
| <b>mmu-miR-3077-5p</b> | 4.21                   | 2.79                   |
| <b>mmu-miR-6932-3p</b> | 4.18                   | 2.79                   |
| <b>mmu-miR-212-5p</b>  | 8.45                   | 2.79                   |
| <b>mmu-miR-6993-5p</b> | 4.21                   | 2.79                   |
| <b>mmu-miR-3067-5p</b> | 3.05                   | 2.79                   |
| <b>mmu-miR-6950-5p</b> | 3.03                   | 2.77                   |
| <b>mmu-miR-92b-3p</b>  | 3.45                   | 2.77                   |
| <b>mmu-miR-7080-3p</b> | 4.05                   | 2.76                   |
| <b>mmu-miR-341-5p</b>  | 7.39                   | 2.75                   |
| <b>mmu-miR-5120</b>    | 3.66                   | 2.74                   |
| <b>mmu-miR-331-3p</b>  | 4.08                   | 2.72                   |
| <b>mmu-miR-1983</b>    | 2.75                   | 2.72                   |
| <b>mmu-miR-7658-3p</b> | 2.38                   | 2.72                   |
| <b>mmu-miR-6916-3p</b> | 3.17                   | 2.71                   |
| <b>mmu-let-7g-3p</b>   | 4.73                   | 2.71                   |
| <b>mmu-miR-3963</b>    | 2.91                   | 2.70                   |
| <b>mmu-miR-7059-3p</b> | 2.91                   | 2.70                   |
| <b>mmu-miR-6922-5p</b> | 2.61                   | 2.70                   |
| <b>mmu-miR-291a-5p</b> | 4.22                   | 2.69                   |
| <b>mmu-miR-6959-5p</b> | 4.10                   | 2.69                   |
| <b>mmu-miR-504-3p</b>  | 2.64                   | 2.68                   |
| <b>mmu-miR-8114</b>    | 2.23                   | 2.68                   |
| <b>mmu-miR-7014-5p</b> | 2.19                   | 2.67                   |

| <b>Gene Symbol</b>     | <b>MnD Fold Change</b> | <b>MnW Fold Change</b> |
|------------------------|------------------------|------------------------|
| <b>mmu-miR-6941-5p</b> | 2.12                   | 2.67                   |
| <b>mmu-miR-7240-5p</b> | 5.00                   | 2.65                   |
| <b>mmu-miR-1894-5p</b> | 2.94                   | 2.65                   |
| <b>mmu-miR-5110</b>    | 4.08                   | 2.65                   |
| <b>mmu-miR-1941-5p</b> | 2.79                   | 2.65                   |
| <b>mmu-miR-3472</b>    | 3.52                   | 2.64                   |
| <b>mmu-miR-211-5p</b>  | 4.74                   | 2.64                   |
| <b>mmu-miR-3075-5p</b> | 2.43                   | 2.64                   |
| <b>mmu-miR-6915-3p</b> | 4.44                   | 2.62                   |
| <b>mmu-miR-7654-5p</b> | 2.36                   | 2.61                   |
| <b>mmu-miR-7047-3p</b> | 3.37                   | 2.61                   |
| <b>mmu-miR-6986-3p</b> | 2.12                   | 2.60                   |
| <b>mmu-miR-7005-5p</b> | 2.89                   | 2.60                   |
| <b>mmu-miR-7056-5p</b> | 3.01                   | 2.60                   |
| <b>mmu-miR-3102-3p</b> | 3.45                   | 2.60                   |
| <b>mmu-miR-677-3p</b>  | 3.37                   | 2.60                   |
| <b>mmu-miR-7647-3p</b> | 2.84                   | 2.59                   |
| <b>mmu-miR-6537-5p</b> | 2.93                   | 2.59                   |
| <b>mmu-miR-6912-3p</b> | 4.99                   | 2.58                   |
| <b>mmu-miR-7679-5p</b> | 4.29                   | 2.58                   |
| <b>mmu-miR-3098-3p</b> | 4.22                   | 2.56                   |
| <b>mmu-miR-6965-3p</b> | 2.96                   | 2.56                   |
| <b>mmu-miR-1956</b>    | 4.72                   | 2.56                   |
| <b>mmu-miR-7235-5p</b> | 4.53                   | 2.56                   |
| <b>mmu-miR-6546-3p</b> | 3.54                   | 2.56                   |
| <b>mmu-miR-6546-5p</b> | 2.80                   | 2.55                   |
| <b>mmu-miR-7685-5p</b> | 4.26                   | 2.53                   |
| <b>mmu-miR-7074-3p</b> | 2.43                   | 2.53                   |
| <b>mmu-miR-1247-3p</b> | 2.94                   | 2.53                   |
| <b>mmu-miR-8105</b>    | 4.36                   | 2.52                   |
| <b>mmu-miR-6941-3p</b> | 2.50                   | 2.52                   |
| <b>mmu-miR-344-5p</b>  | 3.15                   | 2.52                   |
| <b>mmu-miR-7023-5p</b> | 7.57                   | 2.52                   |
| <b>mmu-miR-3098-5p</b> | 4.58                   | 2.51                   |
| <b>mmu-miR-3081-3p</b> | 8.47                   | 2.51                   |
| <b>mmu-miR-8100</b>    | 2.38                   | 2.50                   |
| <b>mmu-miR-6997-3p</b> | 6.16                   | 2.49                   |
| <b>mmu-miR-6957-3p</b> | 2.09                   | 2.49                   |
| <b>mmu-miR-7647-5p</b> | 3.87                   | 2.48                   |
| <b>mmu-miR-710</b>     | 2.48                   | 2.48                   |

| Gene Symbol     | MnD Fold Change | MnW Fold Change |
|-----------------|-----------------|-----------------|
| mmu-miR-5118    | 2.17            | 2.48            |
| mmu-miR-125a-3p | 3.45            | 2.48            |
| mmu-miR-6404    | 6.04            | 2.47            |
| mmu-miR-7027-5p | 3.64            | 2.47            |
| mmu-miR-7002-3p | 10.66           | 2.45            |
| mmu-miR-7024-5p | 2.13            | 2.45            |
| mmu-miR-7079-5p | 3.11            | 2.45            |
| mmu-miR-344f-5p | 3.64            | 2.45            |
| mmu-miR-6978-5p | 4.50            | 2.43            |
| mmu-miR-7074-5p | 3.71            | 2.43            |
| mmu-miR-762     | 4.87            | 2.43            |
| mmu-miR-668-3p  | 2.87            | 2.43            |
| mmu-miR-1249-3p | 2.73            | 2.42            |
| mmu-miR-6958-3p | 2.14            | 2.42            |
| mmu-miR-3104-5p | 2.31            | 2.42            |
| mmu-miR-5116    | 4.28            | 2.42            |
| mmu-miR-3070-5p | 2.28            | 2.40            |
| mmu-miR-6914-3p | 2.79            | 2.39            |
| mmu-miR-5129-5p | 2.08            | 2.38            |
| mmu-miR-6337    | 5.28            | 2.38            |
| mmu-miR-7225-3p | 4.48            | 2.38            |
| mmu-miR-5625-5p | 2.54            | 2.37            |
| mmu-miR-6394    | 2.64            | 2.37            |
| mmu-miR-188-5p  | 2.46            | 2.37            |
| mmu-miR-1932    | 3.15            | 2.36            |
| mmu-miR-3081-5p | 3.34            | 2.36            |
| mmu-miR-6995-5p | 3.37            | 2.35            |
| mmu-miR-1188-5p | 2.54            | 2.35            |
| mmu-miR-6898-5p | 8.66            | 2.35            |
| mmu-miR-7016-3p | 3.54            | 2.34            |
| mmu-miR-3058-3p | 2.08            | 2.34            |
| mmu-miR-7082-3p | 2.42            | 2.34            |
| mmu-miR-3091-3p | 5.51            | 2.33            |
| mmu-miR-7653-5p | 7.33            | 2.33            |
| mmu-miR-6917-5p | 3.79            | 2.33            |
| mmu-miR-150-3p  | 3.64            | 2.33            |
| mmu-miR-1957a   | 2.41            | 2.33            |
| mmu-miR-224-3p  | 2.48            | 2.32            |
| mmu-miR-5106    | 3.78            | 2.32            |
| mmu-miR-9768-5p | 2.62            | 2.32            |

| <b>Gene Symbol</b> | <b>MnD Fold Change</b> | <b>MnW Fold Change</b> |
|--------------------|------------------------|------------------------|
| mmu-miR-7023-3p    | 4.26                   | 2.32                   |
| mmu-miR-7065-5p    | 2.88                   | 2.32                   |
| mmu-miR-8092       | 2.99                   | 2.32                   |
| mmu-miR-1945       | 5.41                   | 2.31                   |
| mmu-miR-504-5p     | 3.85                   | 2.31                   |
| mmu-miR-7003-5p    | 2.36                   | 2.31                   |
| mmu-miR-193b-3p    | 2.50                   | 2.31                   |
| mmu-miR-3620-5p    | 2.03                   | 2.31                   |
| mmu-miR-9769-5p    | 2.62                   | 2.31                   |
| mmu-miR-7015-5p    | 2.78                   | 2.30                   |
| mmu-miR-6954-5p    | 2.64                   | 2.30                   |
| mmu-miR-3569-3p    | 4.14                   | 2.29                   |
| mmu-miR-7077-3p    | 4.12                   | 2.29                   |
| mmu-miR-7024-3p    | 3.86                   | 2.29                   |
| mmu-miR-99b-3p     | 6.83                   | 2.28                   |
| mmu-miR-6954-3p    | 6.95                   | 2.28                   |
| mmu-miR-292a-3p    | 3.08                   | 2.27                   |
| mmu-miR-208a-5p    | 7.64                   | 2.27                   |
| mmu-miR-7020-3p    | 2.98                   | 2.25                   |
| mmu-miR-6944-5p    | 2.64                   | 2.25                   |
| mmu-miR-5127       | 3.04                   | 2.25                   |
| mmu-miR-7665-5p    | 2.43                   | 2.25                   |
| mmu-miR-7681-5p    | 2.65                   | 2.25                   |
| mmu-miR-6976-3p    | 2.88                   | 2.25                   |
| mmu-miR-6935-5p    | 4.18                   | 2.24                   |
| mmu-miR-7063-5p    | 2.18                   | 2.24                   |
| mmu-let-7a-2-3p    | 2.17                   | 2.24                   |
| mmu-miR-6986-5p    | 5.38                   | 2.23                   |
| mmu-miR-7048-3p    | 4.77                   | 2.22                   |
| mmu-miR-7093-5p    | 5.60                   | 2.22                   |
| mmu-miR-8109       | 2.12                   | 2.22                   |
| mmu-miR-7031-3p    | 2.77                   | 2.22                   |
| mmu-miR-3086-5p    | 3.02                   | 2.21                   |
| mmu-miR-7020-5p    | 2.13                   | 2.21                   |
| mmu-miR-5709-3p    | 2.06                   | 2.21                   |
| mmu-miR-505-5p     | 2.15                   | 2.21                   |
| mmu-miR-1668       | 2.49                   | 2.21                   |
| mmu-miR-1981-3p    | 3.15                   | 2.21                   |
| mmu-miR-200c-3p    | 2.32                   | 2.20                   |
| mmu-miR-7672-5p    | 5.37                   | 2.20                   |

| <b>Gene Symbol</b>     | <b>MnD Fold Change</b> | <b>MnW Fold Change</b> |
|------------------------|------------------------|------------------------|
| <b>mmu-miR-6367</b>    | 29.00                  | 2.19                   |
| <b>mmu-miR-1901</b>    | 2.58                   | 2.19                   |
| <b>mmu-miR-346-5p</b>  | 2.40                   | 2.19                   |
| <b>mmu-miR-3085-3p</b> | 2.67                   | 2.18                   |
| <b>mmu-miR-7046-5p</b> | 2.22                   | 2.18                   |
| <b>mmu-miR-7655-5p</b> | 6.08                   | 2.18                   |
| <b>mmu-miR-451b</b>    | 6.01                   | 2.18                   |
| <b>mmu-miR-666-5p</b>  | 2.40                   | 2.18                   |
| <b>mmu-miR-7236-3p</b> | 2.79                   | 2.17                   |
| <b>mmu-miR-6952-3p</b> | 3.20                   | 2.16                   |
| <b>mmu-miR-7040-5p</b> | 3.24                   | 2.16                   |
| <b>mmu-miR-7220-3p</b> | 3.56                   | 2.15                   |
| <b>mmu-miR-7683-5p</b> | 2.42                   | 2.15                   |
| <b>mmu-miR-7234-3p</b> | 3.31                   | 2.15                   |
| <b>mmu-miR-804</b>     | 2.81                   | 2.15                   |
| <b>mmu-miR-8116</b>    | 19.79                  | 2.15                   |
| <b>mmu-miR-7044-3p</b> | 4.98                   | 2.14                   |
| <b>mmu-miR-6378</b>    | 7.83                   | 2.14                   |
| <b>mmu-miR-7045-3p</b> | 2.58                   | 2.14                   |
| <b>mmu-miR-6910-5p</b> | 3.08                   | 2.14                   |
| <b>mmu-miR-7666-5p</b> | 9.62                   | 2.14                   |
| <b>mmu-miR-425-3p</b>  | 2.52                   | 2.14                   |
| <b>mmu-miR-7214-5p</b> | 2.12                   | 2.14                   |
| <b>mmu-miR-6919-5p</b> | 5.35                   | 2.13                   |
| <b>mmu-miR-326-5p</b>  | 3.00                   | 2.13                   |
| <b>mmu-miR-7662-5p</b> | 3.34                   | 2.13                   |
| <b>mmu-miR-7238-3p</b> | 4.13                   | 2.12                   |
| <b>mmu-miR-5617-5p</b> | 3.45                   | 2.12                   |
| <b>mmu-miR-7222-3p</b> | 8.06                   | 2.11                   |
| <b>mmu-miR-874-3p</b>  | 2.83                   | 2.09                   |
| <b>mmu-miR-6961-3p</b> | 3.62                   | 2.09                   |
| <b>mmu-miR-145a-3p</b> | 3.26                   | 2.09                   |
| <b>mmu-miR-345-3p</b>  | 6.38                   | 2.09                   |
| <b>mmu-miR-5046</b>    | 3.12                   | 2.08                   |
| <b>mmu-miR-2137</b>    | 2.22                   | 2.07                   |
| <b>mmu-miR-7237-5p</b> | 2.11                   | 2.07                   |
| <b>mmu-miR-7213-3p</b> | 4.59                   | 2.07                   |
| <b>mmu-miR-7040-3p</b> | 2.08                   | 2.07                   |
| <b>mmu-miR-449a-3p</b> | 2.55                   | 2.06                   |
| <b>mmu-miR-191-3p</b>  | 4.07                   | 2.06                   |

| <b>Gene Symbol</b>      | <b>MnD Fold Change</b> | <b>MnW Fold Change</b> |
|-------------------------|------------------------|------------------------|
| <b>mmu-miR-702-3p</b>   | 4.40                   | 2.05                   |
| <b>mmu-miR-501-5p</b>   | 2.37                   | 2.05                   |
| <b>mmu-miR-363-3p</b>   | 2.34                   | 2.05                   |
| <b>mmu-miR-7660-5p</b>  | 7.19                   | 2.04                   |
| <b>mmu-miR-128-1-5p</b> | 2.29                   | 2.04                   |
| <b>mmu-miR-1934-5p</b>  | 3.29                   | 2.04                   |
| <b>mmu-miR-7041-3p</b>  | 2.33                   | 2.04                   |
| <b>mmu-miR-8120</b>     | 2.46                   | 2.03                   |
| <b>mmu-miR-6400</b>     | 2.10                   | 2.03                   |
| <b>mmu-miR-6988-3p</b>  | 3.33                   | 2.02                   |
| <b>mmu-miR-205-3p</b>   | 3.18                   | 2.01                   |
| <b>mmu-miR-6946-5p</b>  | 2.10                   | 2.01                   |
| <b>mmu-miR-6956-3p</b>  | 2.64                   | 2.01                   |



**Table S6. Down-regulated Genes Linked to Mn Treatment**

| <b>Gene Symbol</b> | <b>MnD Fold Change</b> | <b>MnW Fold Change</b> |
|--------------------|------------------------|------------------------|
| mmu-miR-219a-5p    | -48.57                 | -71.13                 |
| mmu-miR-374c-5p    | -9.89                  | -13.27                 |
| mmu-miR-290b-3p    | 2.27                   | -6.29                  |
| mmu-miR-3089-5p    | -2.38                  | -5.44                  |
| mmu-miR-7660-3p    | -2.04                  | -4.38                  |
| mmu-miR-499-5p     | -2.23                  | -4.31                  |
| mmu-miR-29c-3p     | -2.70                  | -4.19                  |
| mmu-miR-30f        | -5.78                  | -4.10                  |
| mmu-miR-468-3p     | -2.58                  | -3.84                  |
| mmu-miR-216b-5p    | -2.23                  | -3.83                  |
| mmu-miR-34a-5p     | -3.77                  | -3.50                  |
| mmu-miR-3074-5p    | -3.57                  | -3.35                  |
| mmu-miR-30a-5p     | -3.52                  | -3.10                  |
| mmu-miR-23a-3p     | -3.55                  | -2.96                  |
| mmu-miR-140-3p     | -2.57                  | -2.96                  |
| mmu-miR-511-3p     | -2.75                  | -2.90                  |
| mmu-miR-10a-5p     | -2.64                  | -2.85                  |
| mmu-miR-223-3p     | -2.53                  | -2.80                  |
| mmu-miR-29b-3p     | -3.62                  | -2.65                  |
| mmu-miR-15b-5p     | -2.04                  | -2.64                  |
| mmu-miR-7243-3p    | -2.07                  | -2.56                  |
| mmu-miR-671-5p     | -2.20                  | -2.53                  |
| mmu-miR-652-3p     | -2.66                  | -2.52                  |
| mmu-miR-24-3p      | -3.02                  | -2.34                  |
| mmu-miR-22-3p      | -2.77                  | -2.33                  |
| mmu-miR-449a-5p    | -2.19                  | -2.25                  |
| mmu-miR-30d-5p     | -2.59                  | -2.24                  |
| mmu-miR-7012-5p    | 2.22                   | -2.16                  |
| mmu-miR-669n       | -2.34                  | -2.14                  |
| mmu-miR-20a-5p     | -2.80                  | -2.11                  |
| mmu-miR-297c-5p    | -2.08                  | -2.10                  |
| mmu-miR-299a-5p    | -3.64                  | -2.02                  |
